# Supplementary material for: How to use a rotating ring-disc electrode (RRDE) subtraction method to investigate the electrocatalytic oxygen reduction reaction?
Source: Royal Society of Chemistry journal article supplement (doi:10.1039/d2cy01744j), 2022-12-23
Supplement: d2cy01744j1.pdf [file d2cy01744j1.pdf]

# How to use rotating ring-disc electrode (RRDE) subtraction method to investigate the electrocatalytic oxygen reduction reaction?

Angelina Kerschbaumer<sup>§</sup>, Dominik Wielend<sup>§</sup>, Elisabeth Leeb\*, Corina Schimanofsky, Nadine

Kleinbruckner, Helmut Neugebauer, Mihai Irimia-Vladu, Niyazi Serdar Sariciftci

Linz Institute for Organic Solar Cells (LIOS), Institute of Physical Chemistry, Johannes Kepler

University Linz, Altenberger Straße 69, 4040 Linz, Austria.

(\*E-mail: [elisabeth.leeb@jku.at](mailto:elisabeth.leeb@jku.at))

## Supporting Information

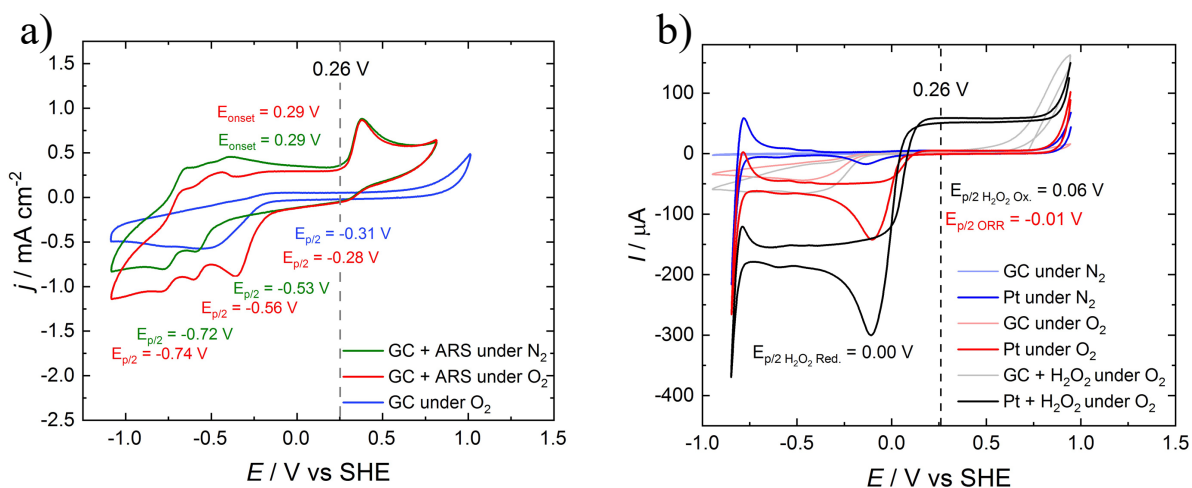

Figure S1: CVs for determining the ring potential with a) CV of 1 mM ARS in 0.1 M NaOH with the onset potential of its oxidation and b) CV curves of GC and Pt under N<sub>2</sub> and O<sub>2</sub> saturated conditions as well as of a 5 mM H<sub>2</sub>O<sub>2</sub> solution in 0.1 M NaOH.

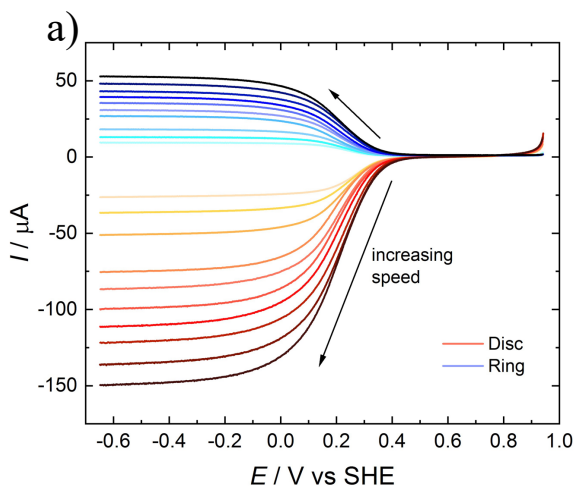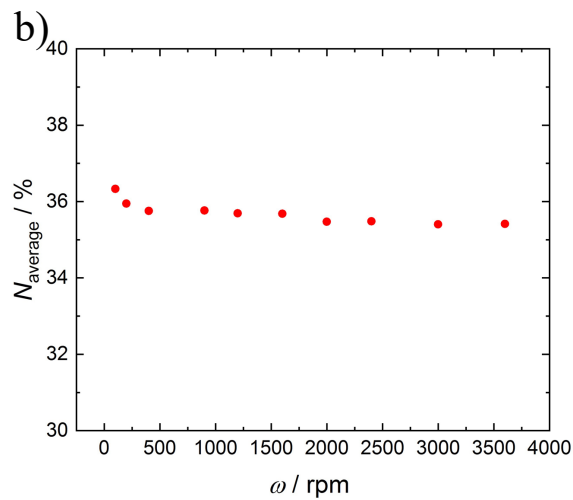

Figure S2: a) LSV of 1 mM  $K_3[Fe(CN)_6]$  in 0.1 M NaOH using different rotational speeds under  $N_2$  and b) average collection efficiency  $N$  at corresponding rotation rates.

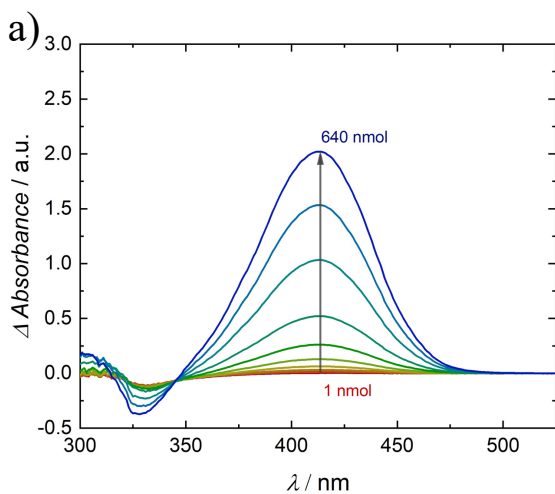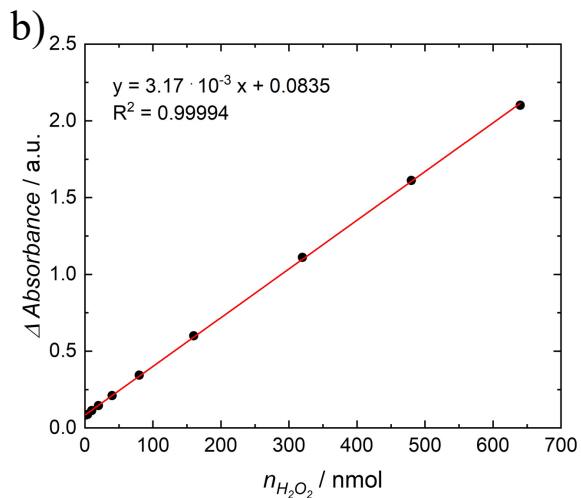

Figure S3: a) UV-VIS absorption spectra and b) calibration plot for the  $H_2O_2$  quantification.

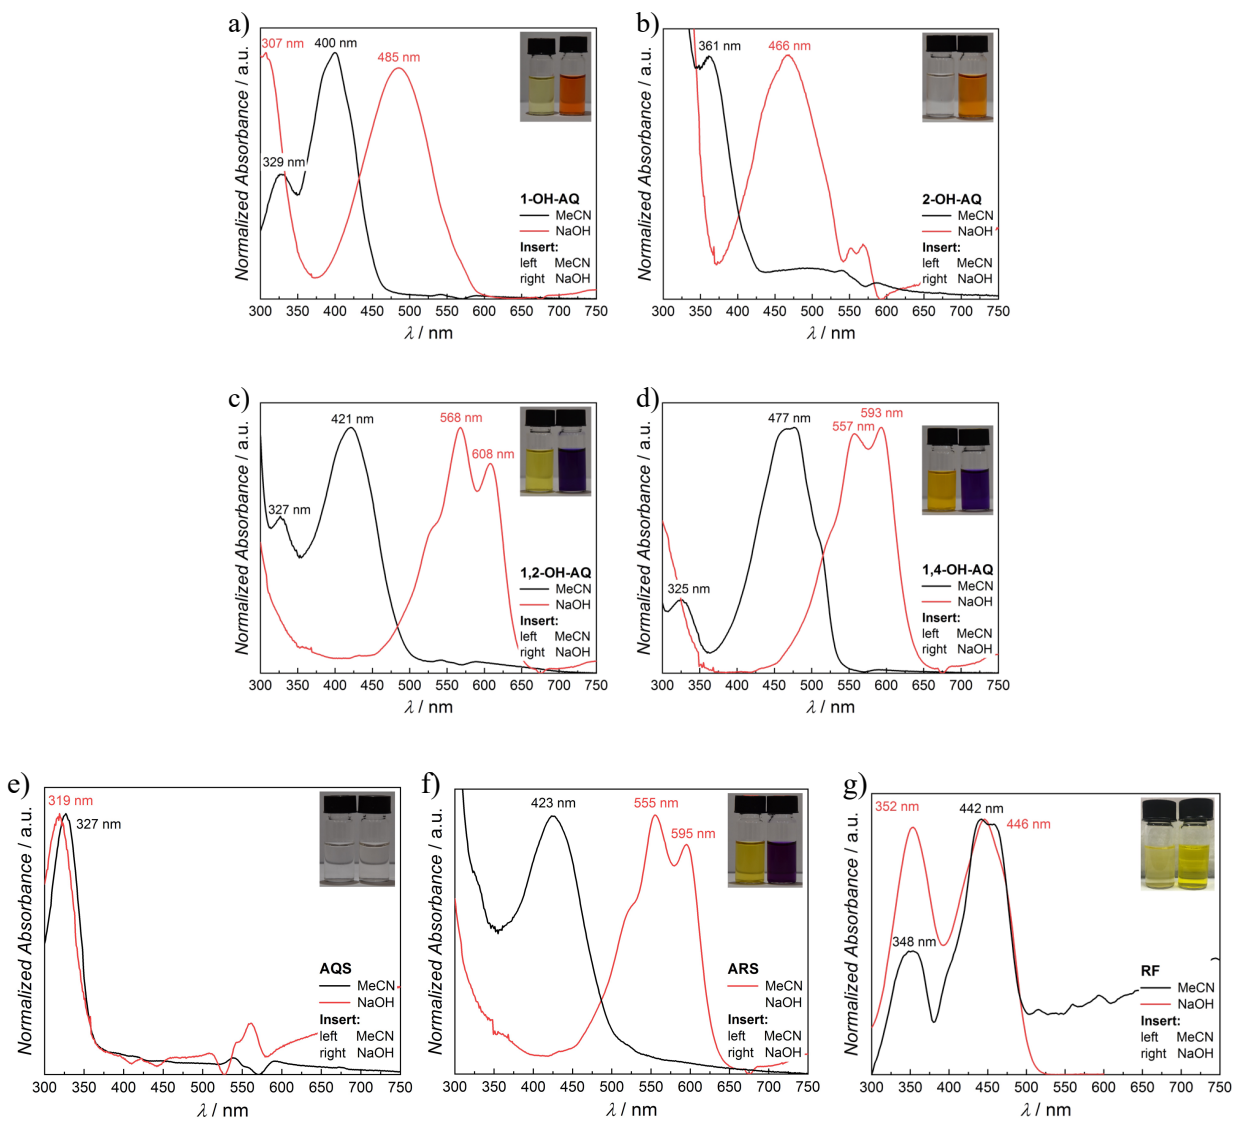

Figure S4: UV-Vis graphs of materials in MeCN and NaOH with picture of vials in the inset. a) 1-OH-AQ, b) 2-OH-AQ, c) 1,2-OH-AQ, d) 1,4-OH-AQ, e) AQS, f) ARS, and g) RF.

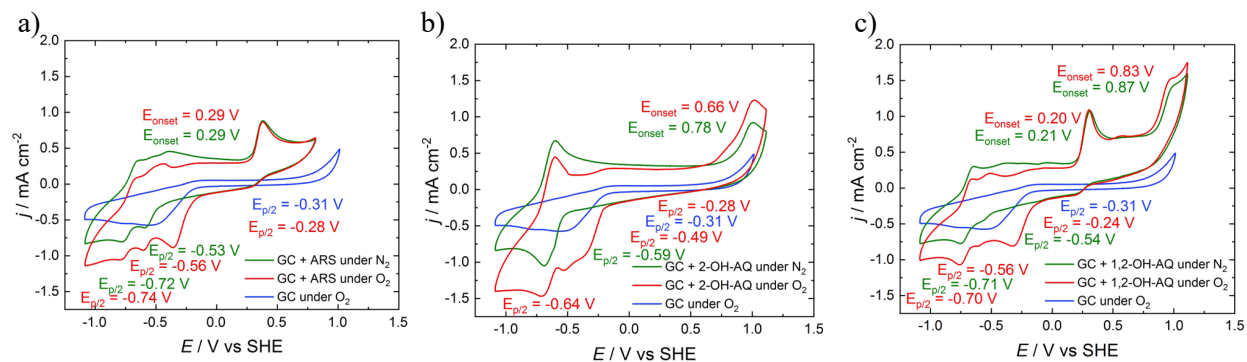

Figure S5: CV studies of 1 mM solutions of a) ARS, b) 2-OH-AQ, and c) 1,2-OH-AQ in 0.1 M NaOH recorded with a GC disc electrode at  $200 \text{ mV s}^{-1}$ .

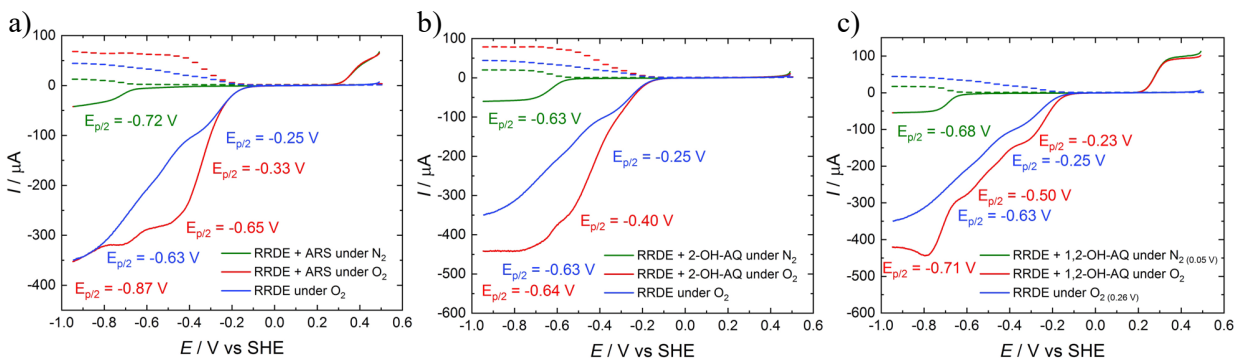

Figure S6: LSV graphs with ring (dashed line) and disc (solid line) current of 0.4 mM solutions of a) ARS, b) 2-OH-AQ and c) 1,2-OH-AQ in 0.1 M NaOH recorded with a GC/Pt RRDE electrode at 10 mV s<sup>-1</sup>. The graphs shown were recorded at 900 rpm and a ring potential of 0.26 V unless stated otherwise.

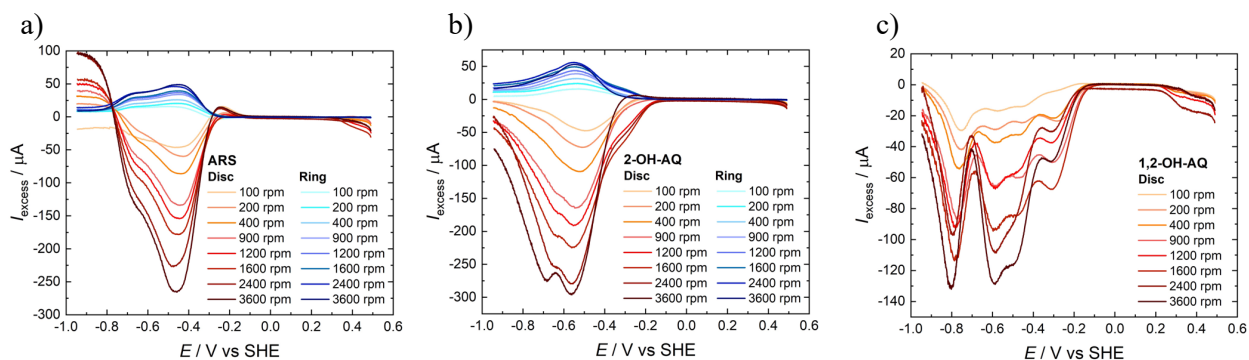

Figure S7: Excess current graphs of 0.4 mM solutions of a) ARS, b) 1-OH-AQ, and c) 1,2-OH-AQ in 0.1 M NaOH recorded with a GC/Pt RRDE electrode at 10 mV s<sup>-1</sup>.

Table S1: Diffusion coefficients in 0.1 M NaOH and MeCN.

| Compounds | D <sub>0</sub> / cm s <sup>-1</sup> |                         |
|-----------|-------------------------------------|-------------------------|
|           | NaOH                                | MeCN                    |
| 1-OH-AQ   | 8.73 · 10 <sup>-6</sup>             | 1.47 · 10 <sup>-5</sup> |
| 2-OH-AQ   | 4.46 · 10 <sup>-6</sup>             | 3.79 · 10 <sup>-6</sup> |
| 1,2-OH-AQ | 2.30 · 10 <sup>-6</sup>             | 1.15 · 10 <sup>-5</sup> |
| 1,4-OH-AQ | 2.58 · 10 <sup>-6</sup>             | 1.23 · 10 <sup>-5</sup> |
| AQS       | 3.49 · 10 <sup>-6</sup>             | 7.96 · 10 <sup>-6</sup> |
| ARS       | 3.34 · 10 <sup>-7</sup>             | 3.09 · 10 <sup>-6</sup> |
| RF        | 2.20 · 10 <sup>-6</sup>             | -                       |
| AQ        | -                                   | 1.92 · 10 <sup>-5</sup> |



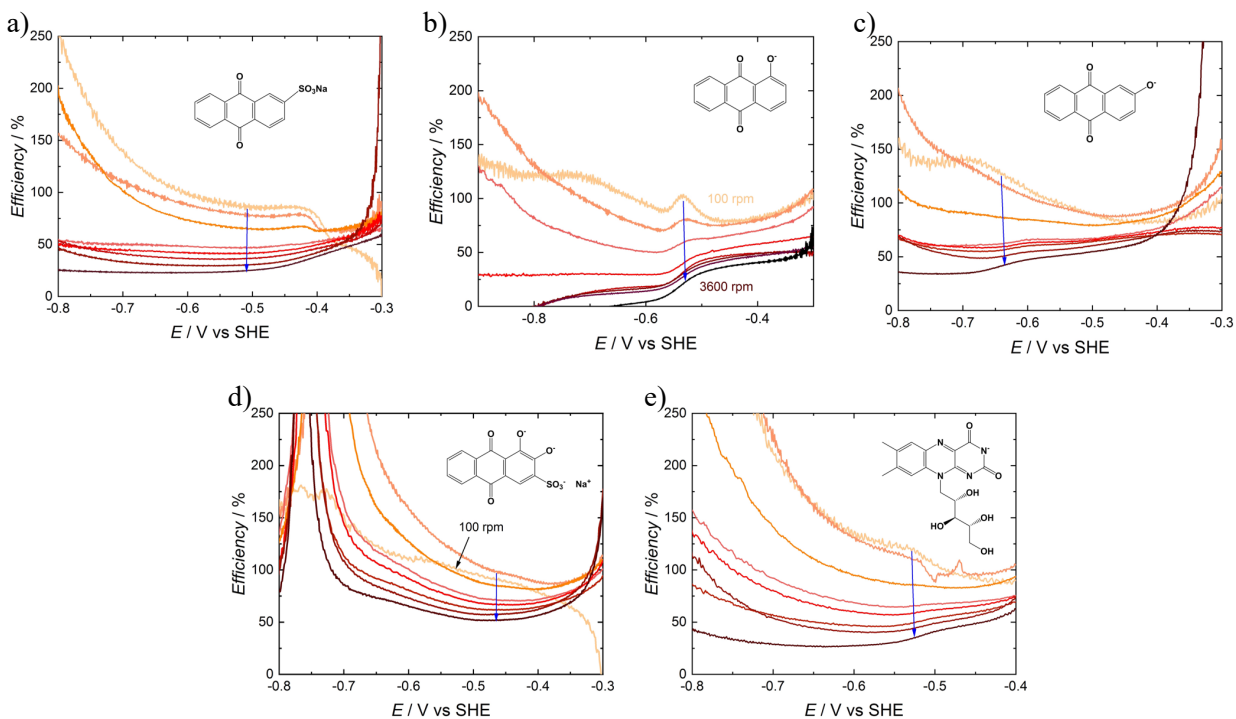

Figure S8: Excess efficiencies of a) AQS, b) 1-OH-AQ, c) 2-OH-AQ, d) ARS, and e) RF in 0.1 M NaOH.

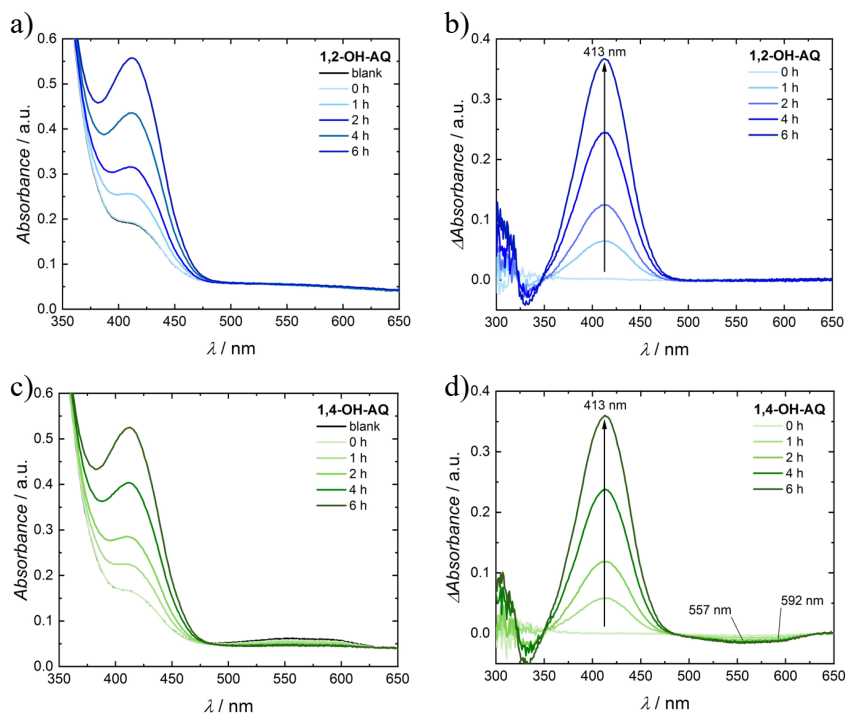

Figure S9: Comparison of the UV-Vis absorption spectra of  $\text{H}_2\text{O}_2$  quantification of electrolysis over the course of 6 h as well as the  $\Delta$ absorbance spectra using a, b) 1,2-OH-AQ and c, d) 1,4-OH-AQ as catalyst.

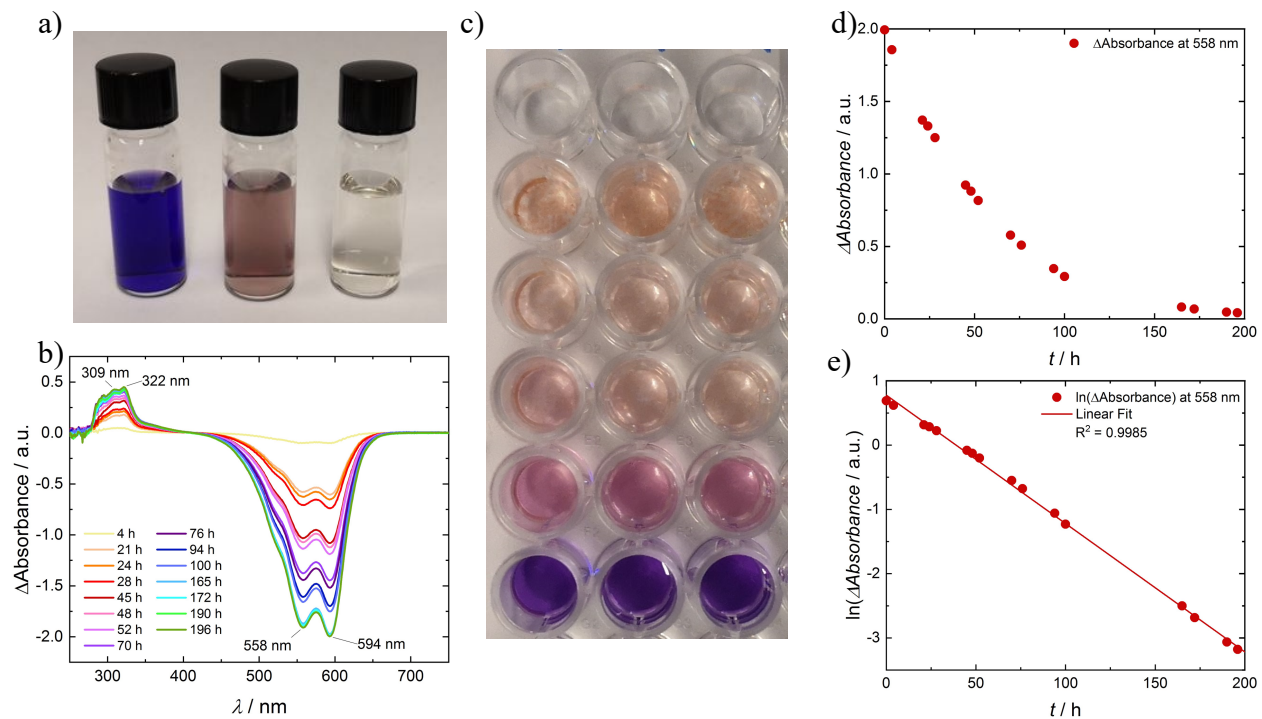

Figure S10: Study of colour disappearance of different 1,4-OH-AQ solutions in 0.1 M NaOH over time: a) picture of freshly made solution, as well as after 1 week and 2 months of storage, b)  $\Delta$ absorbance spectra with increasing storage time c) picture of the well plate used for  $H_2O_2$  detection, d)  $\Delta$ absorbance at 558 nm against time and e) logarithm of  $\Delta$ absorbance at 558 nm against time.

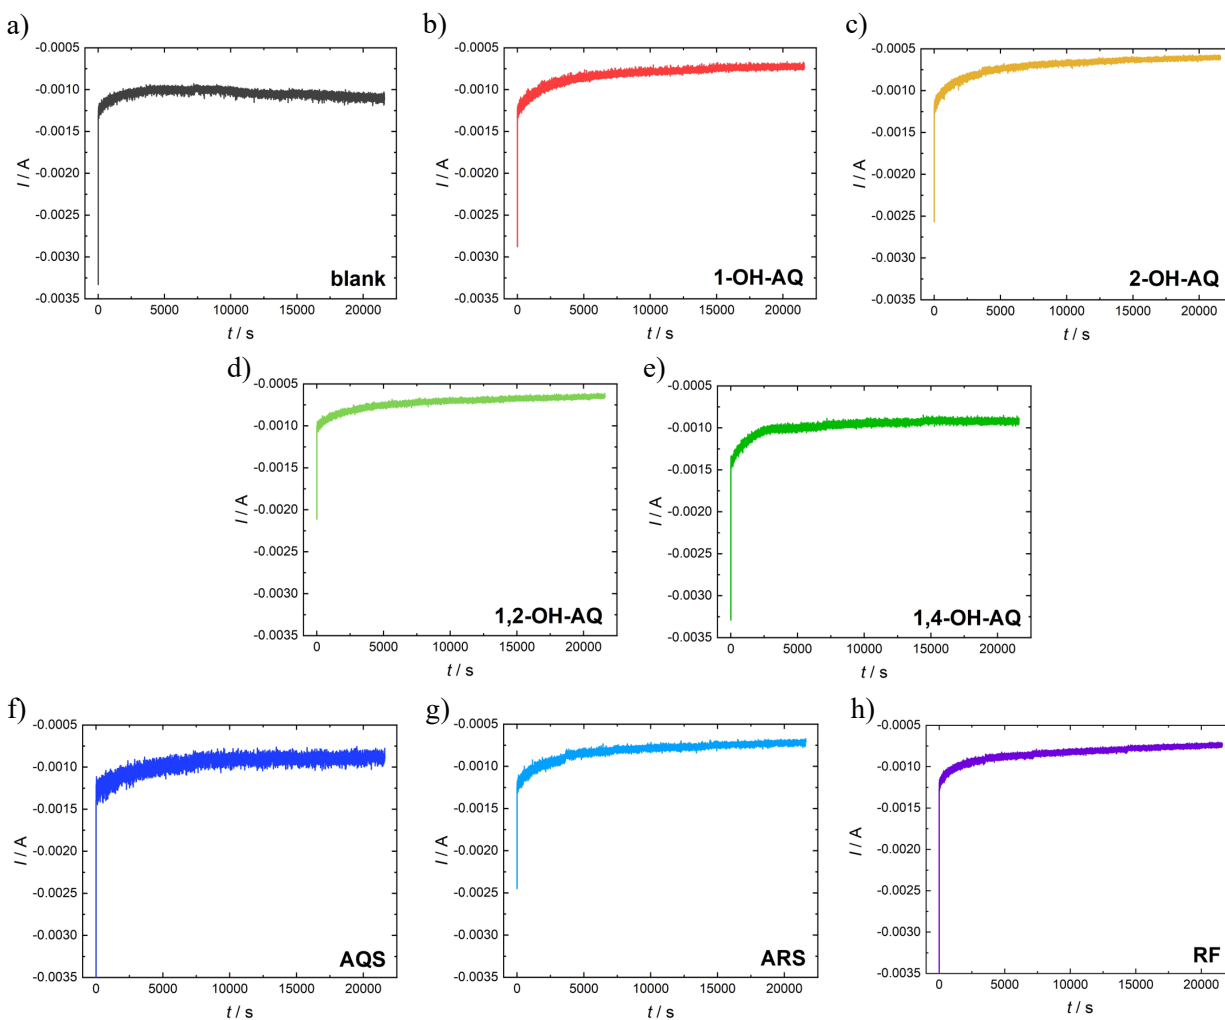

Figure S11: Current vs. time plots of all chronoamperometric measurements in 0.1 M NaOH at -400 mV. a) blank, 0.1 M NaOH without any catalyst added, b) 1-OH-AQ, c) 2-OH-AQ, d) 1,2-OH-AQ, e) 1,4-OH-AQ, f) AQS, g) ARS and h) RF.

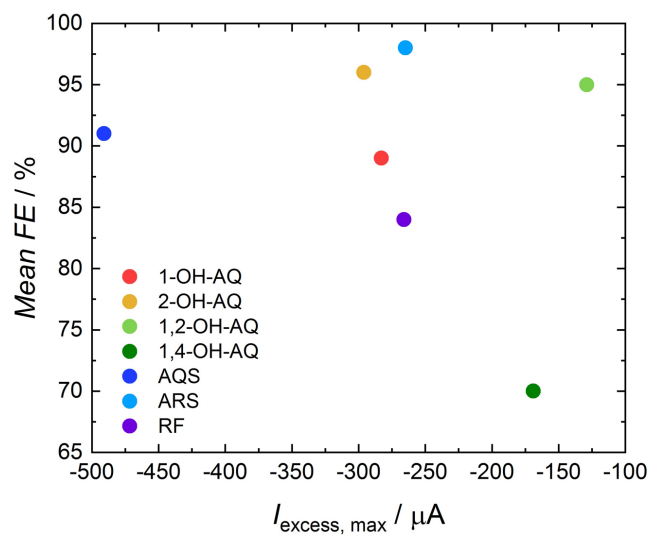

Figure S12: Mean FE over 6h of electrolysis in dependence of the maximum excess current.
